# Supplementary material for: Cytotoxic Natural Products Isolated from Cryptogramma crispa (L.) R. Br.
Source: MDPI journal article supplement (doi:10.3390/molecules28237723), 2023-11-23

# Cytotoxic Natural Products Isolated from *Cryptogramma crispera* (L.) R. Br.

## Supplementary Data

NMR spectra

Mass spectrum

CD spectrum

UV spectrum

Figure S1. 1D  $^1\text{H}$  NMR spectrum of 3-manolyl pteroside D

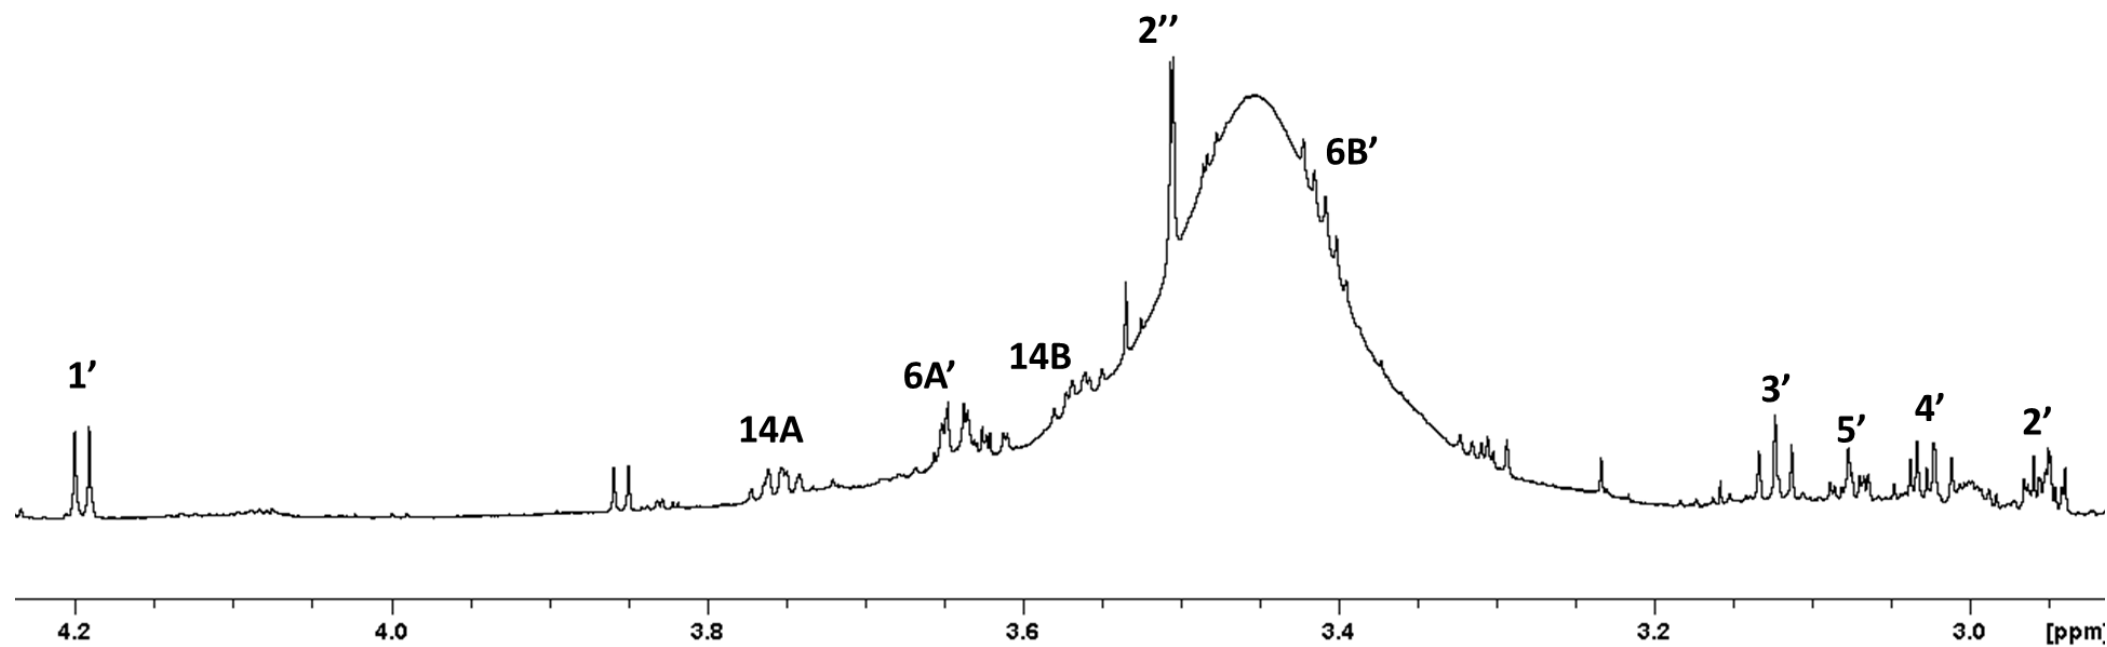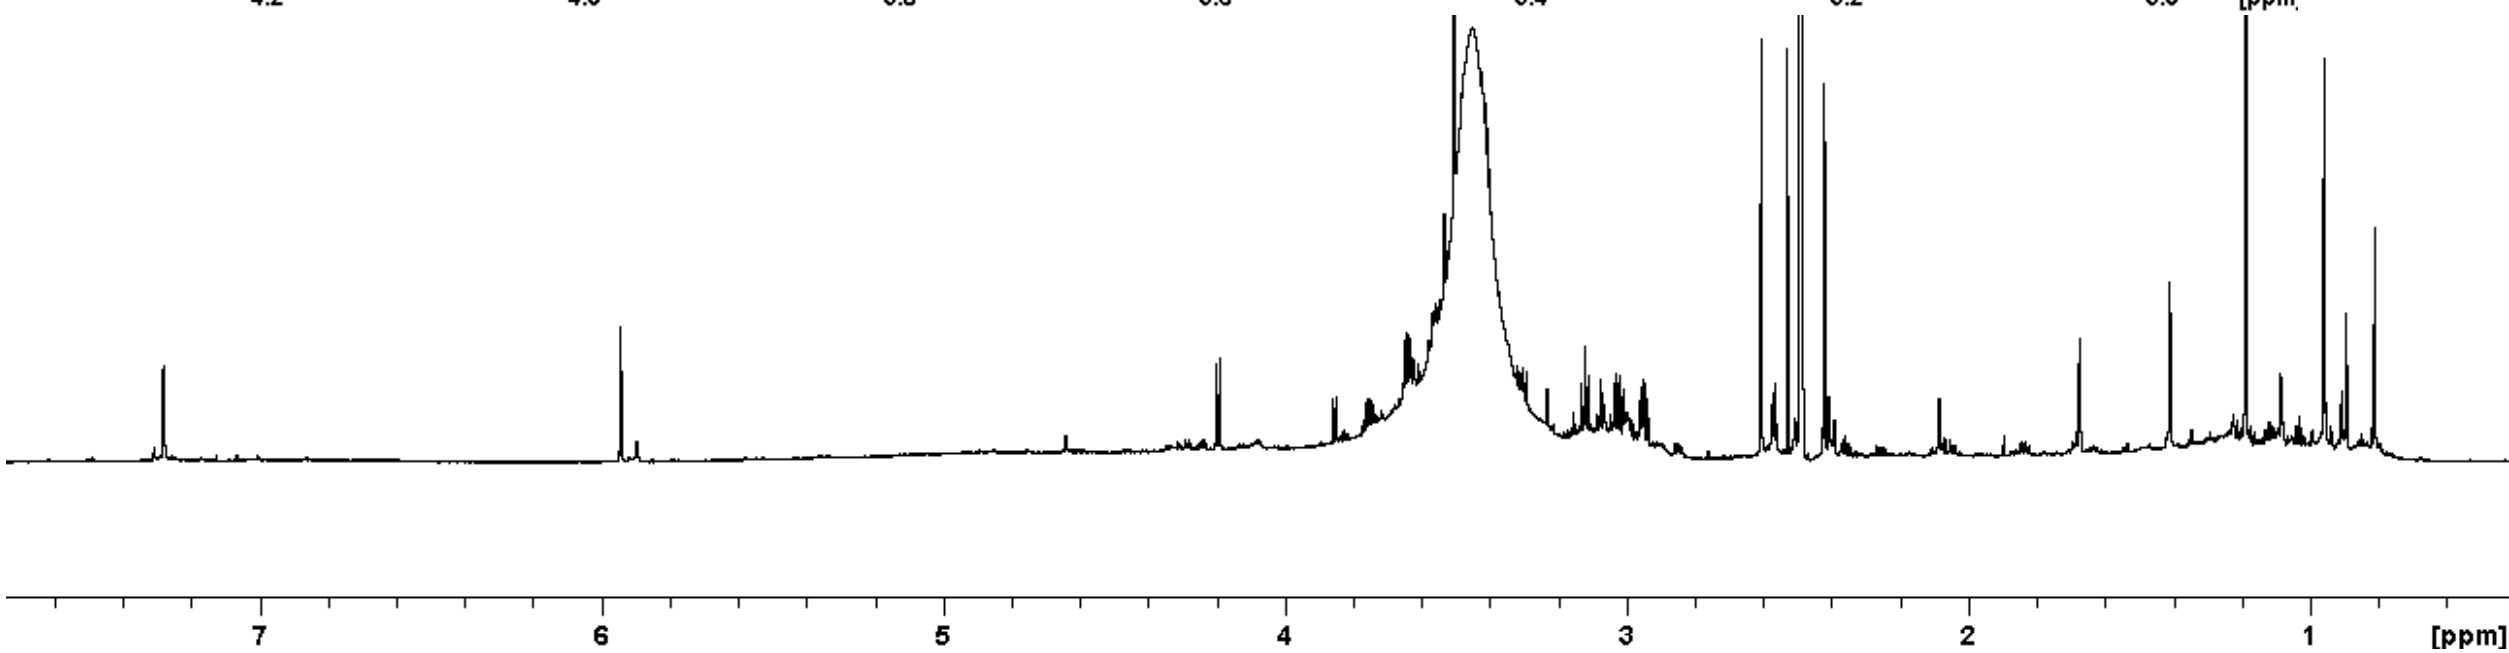

Figure S2. 1D  $^1\text{H}$  selective TOCSY NMR spectrum of 3-manolyl pteroside D

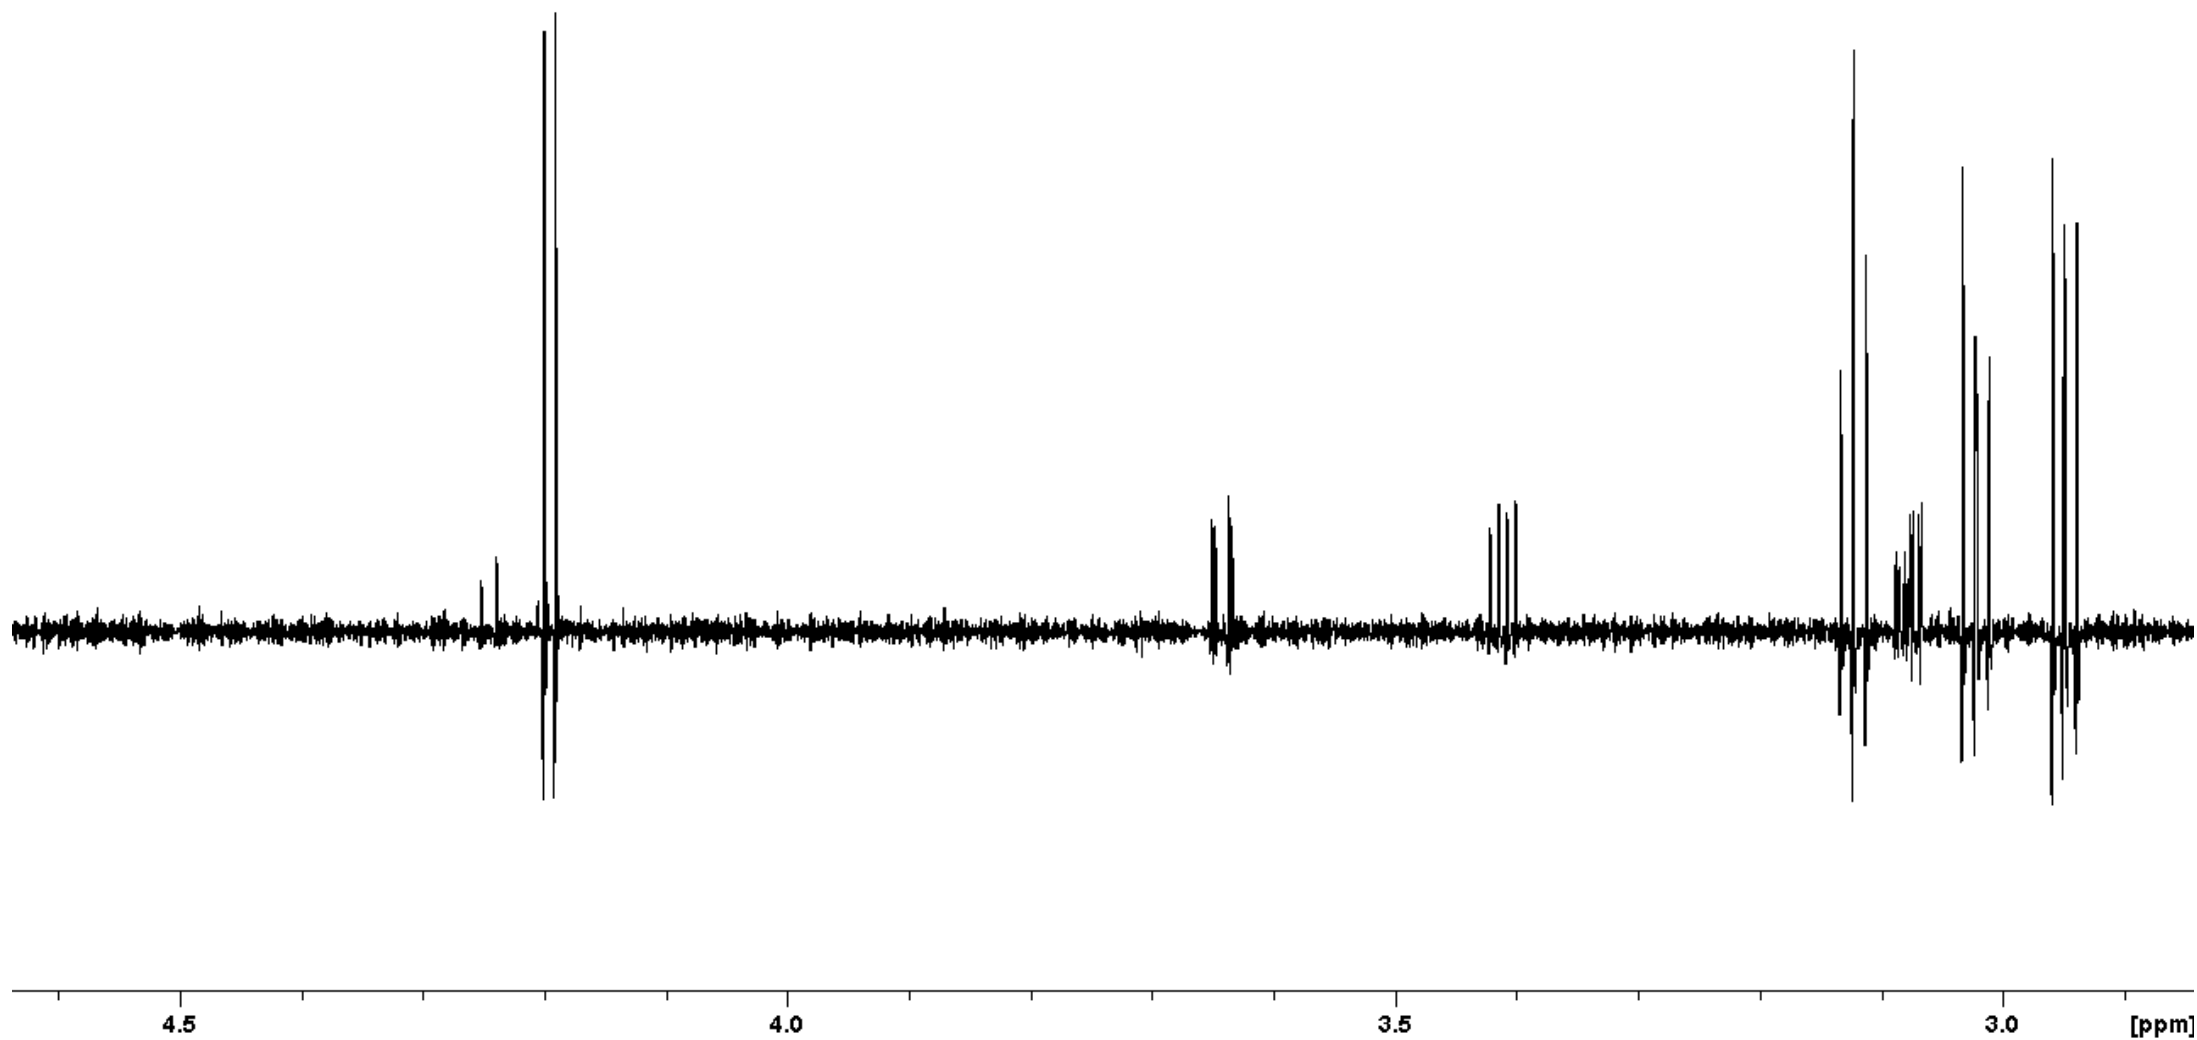

Figure S3. 1D  $^{13}\text{C}$ APT NMR spectrum of 3-manolyl pteroside D

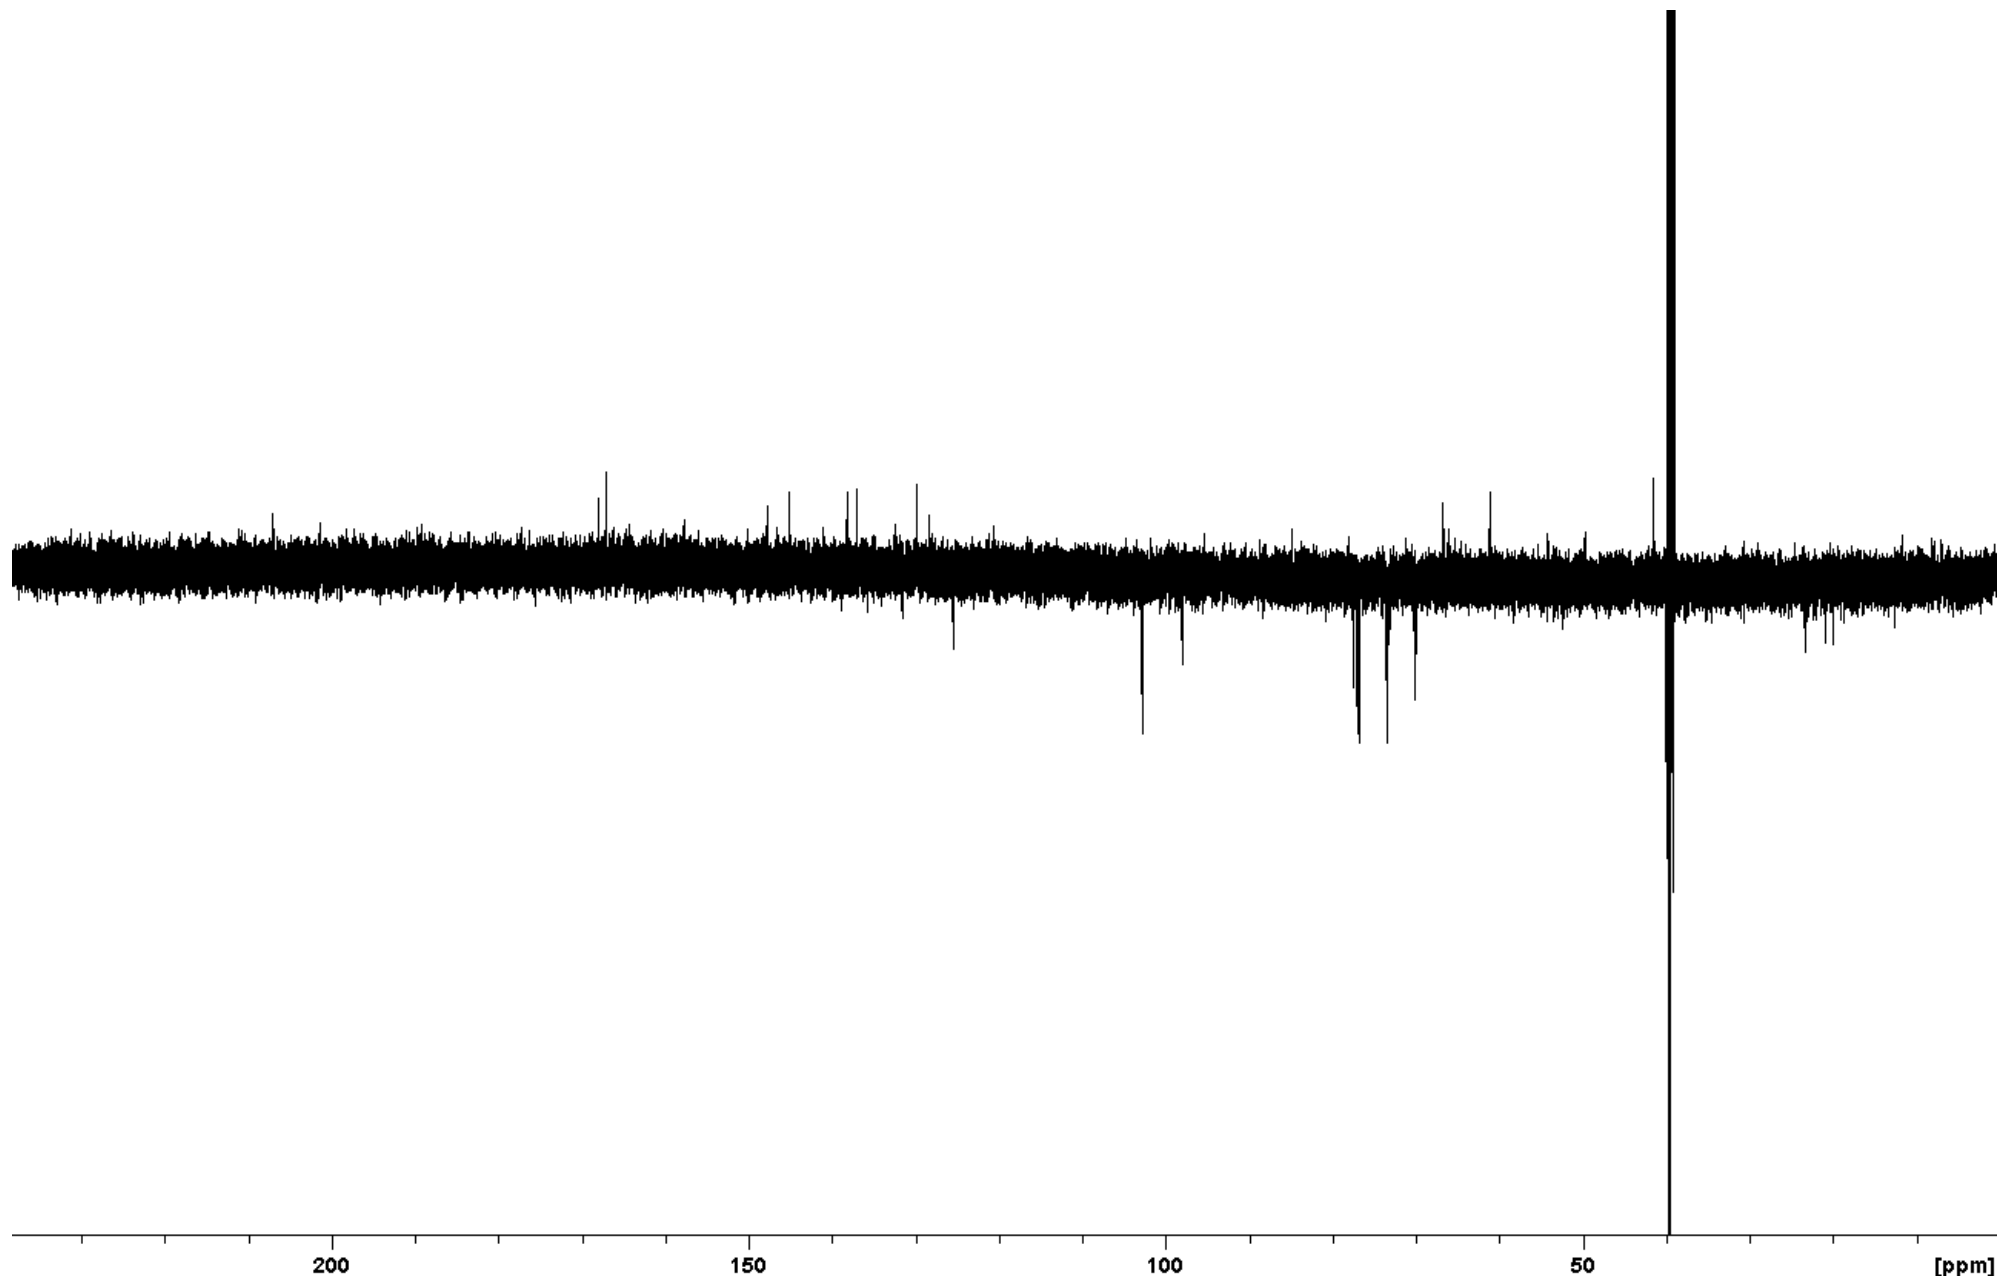

Figure S4. 2D  $^1\text{H}$ - $^{13}\text{C}$  HMBC NMR spectrum of 3-manolyl pteroside D

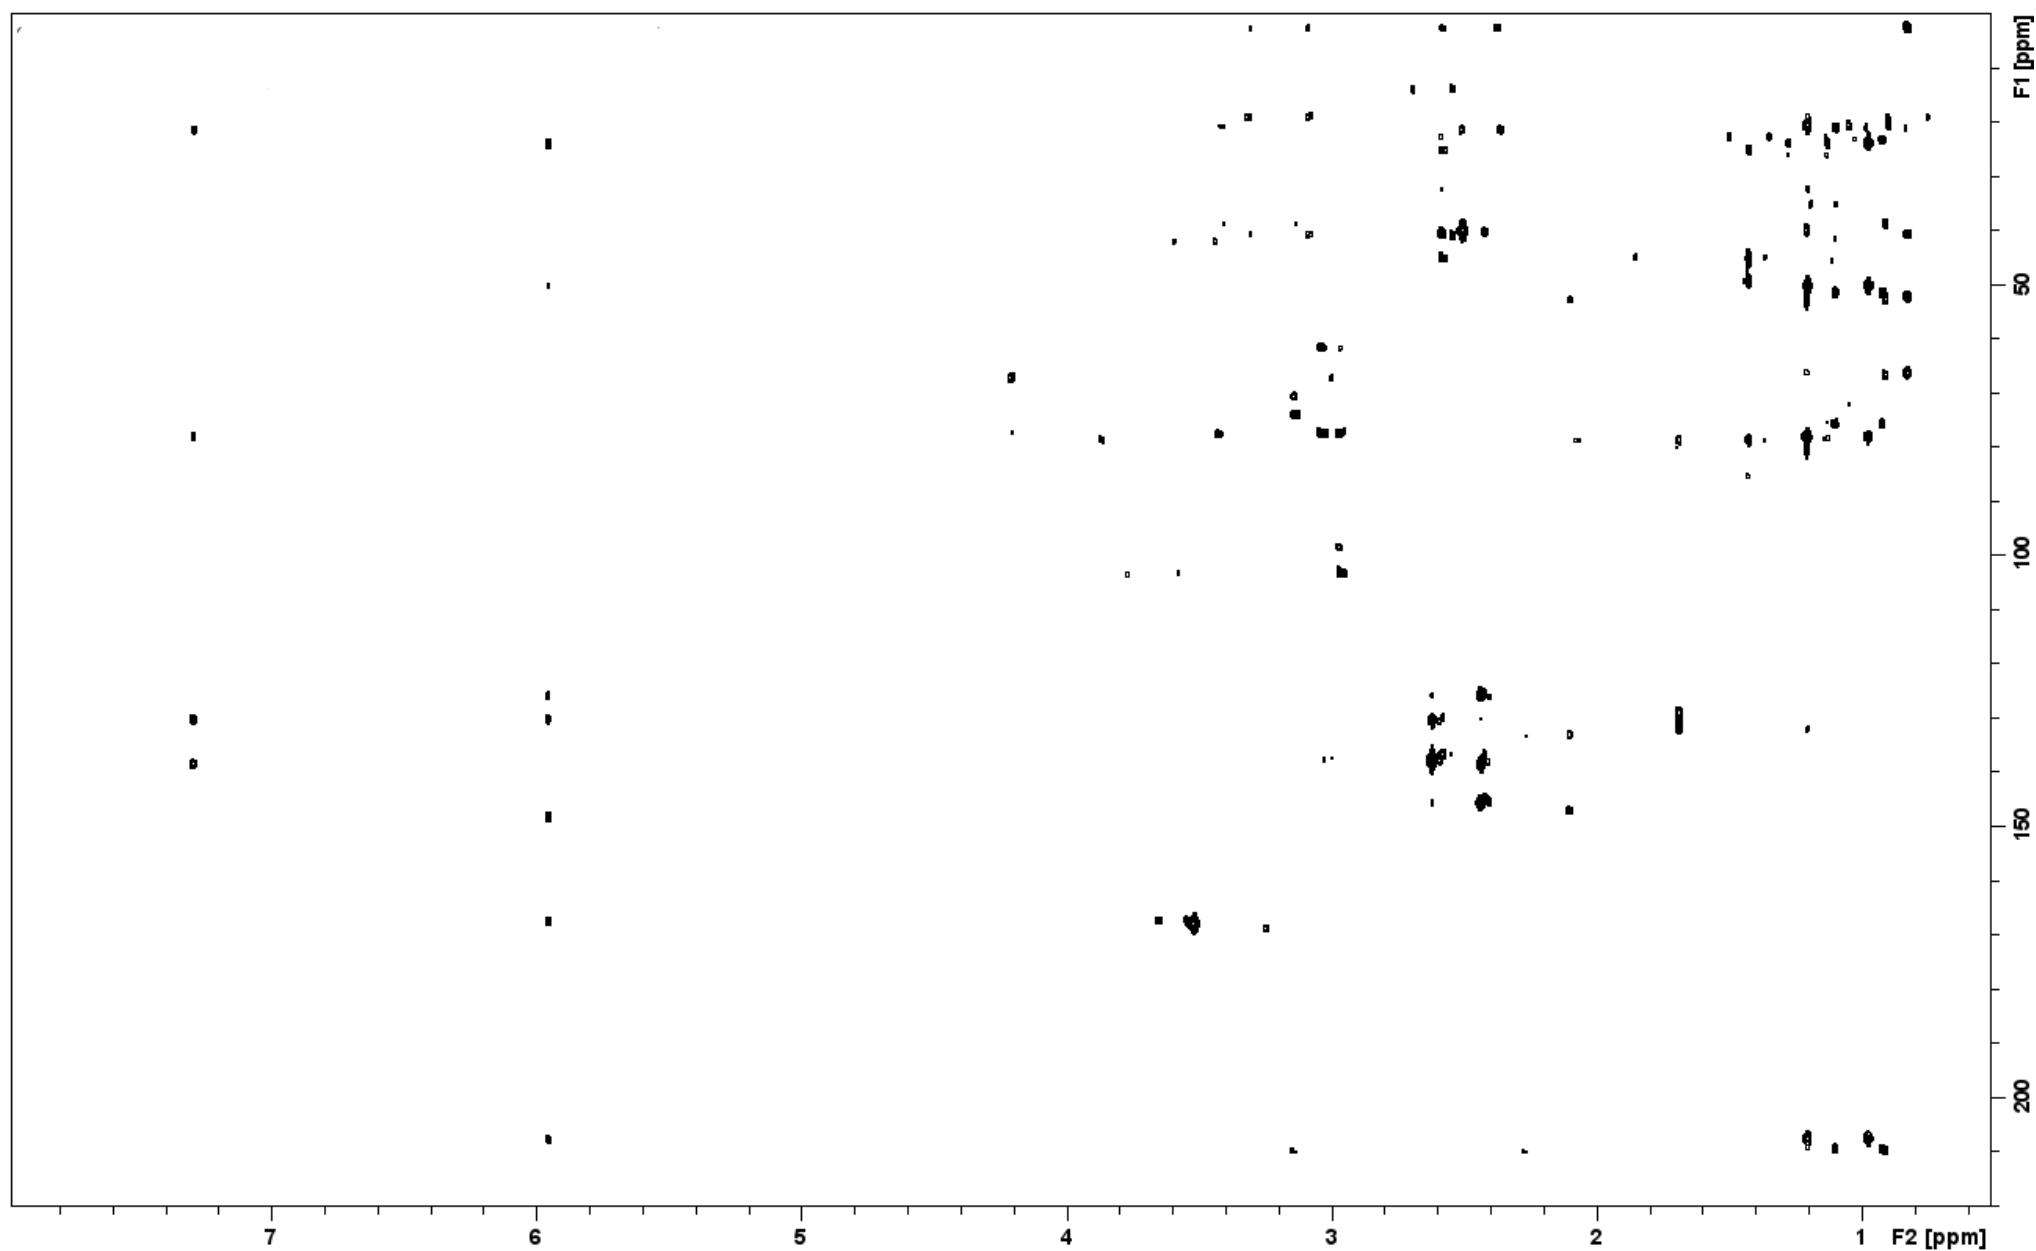

Figure S5. 2D  $^1\text{H}$ - $^{13}\text{C}$  HSQC NMR spectrum of 3-manolyl pteroside D.

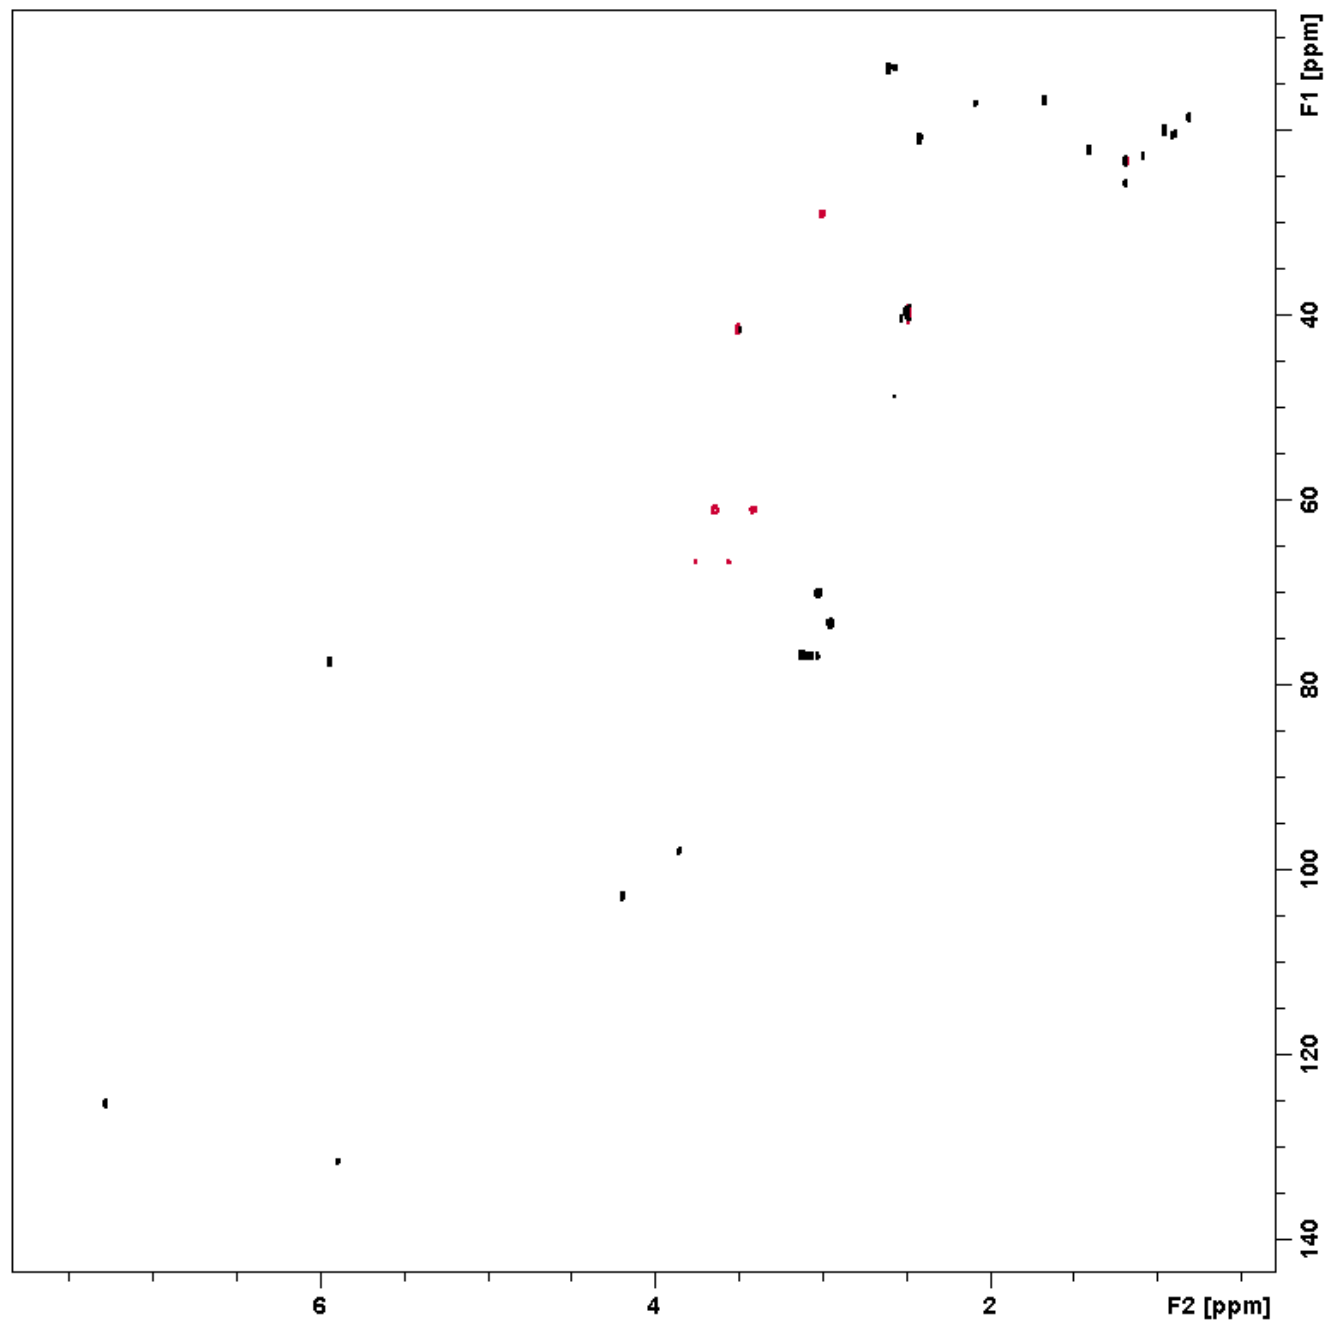

Figure S6. 2D  $^1\text{H}$ - $^{13}\text{C}$  H2BC NMR spectrum of 3-manolyl pteroside D.

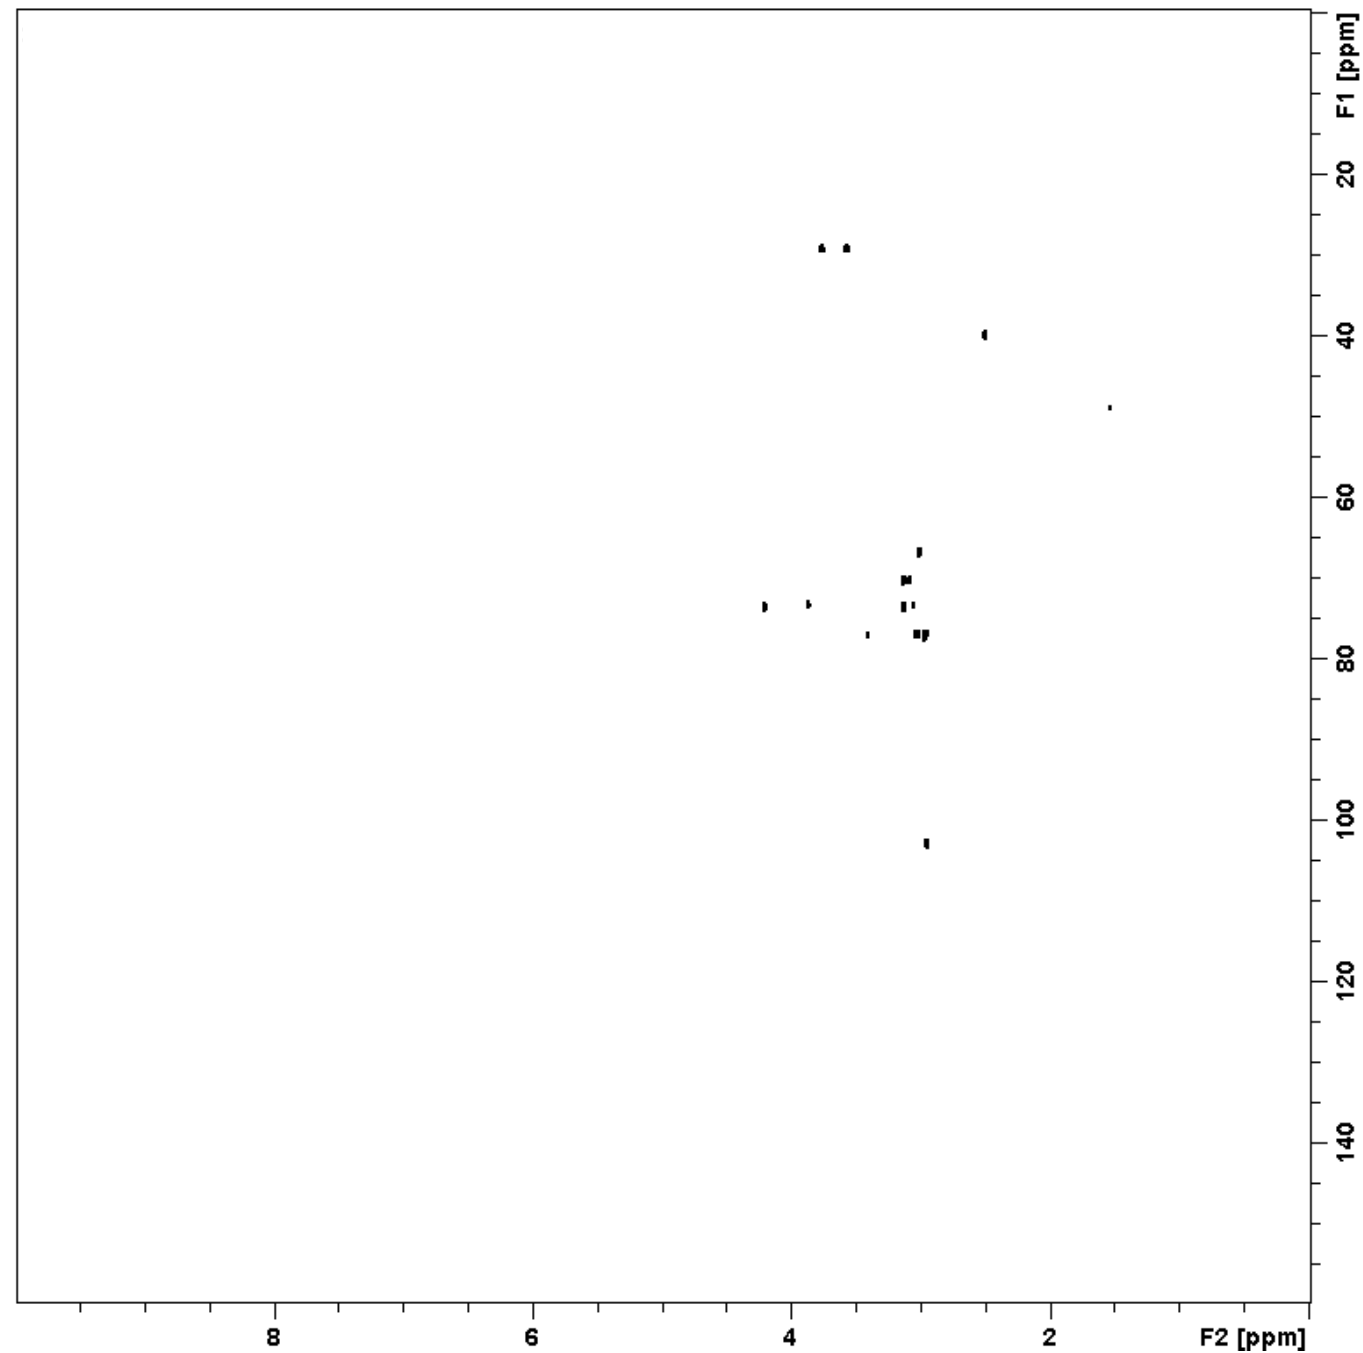

Figure S7. 2D  $^1\text{H}$ - $^1\text{H}$  COSY NMR spectrum of 3-manolyl pteroside D.

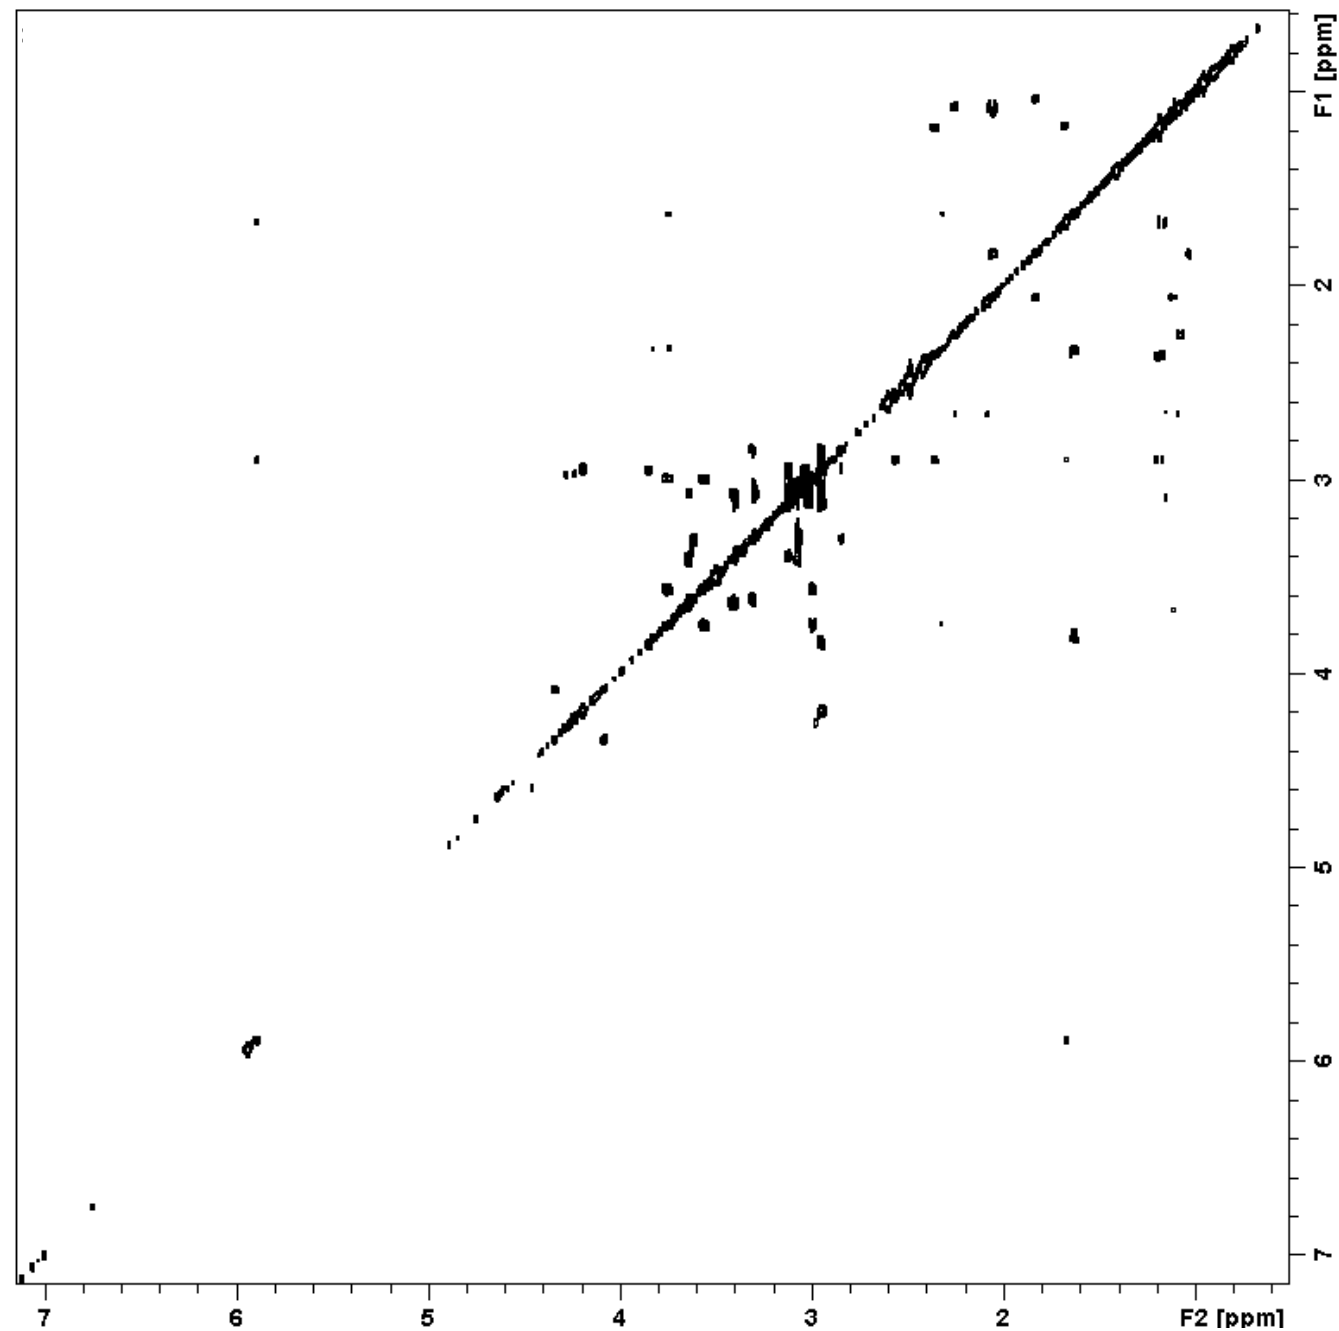



Figure S8. High Resolution Mass Spectrum of 3-manolyl pteroside D.

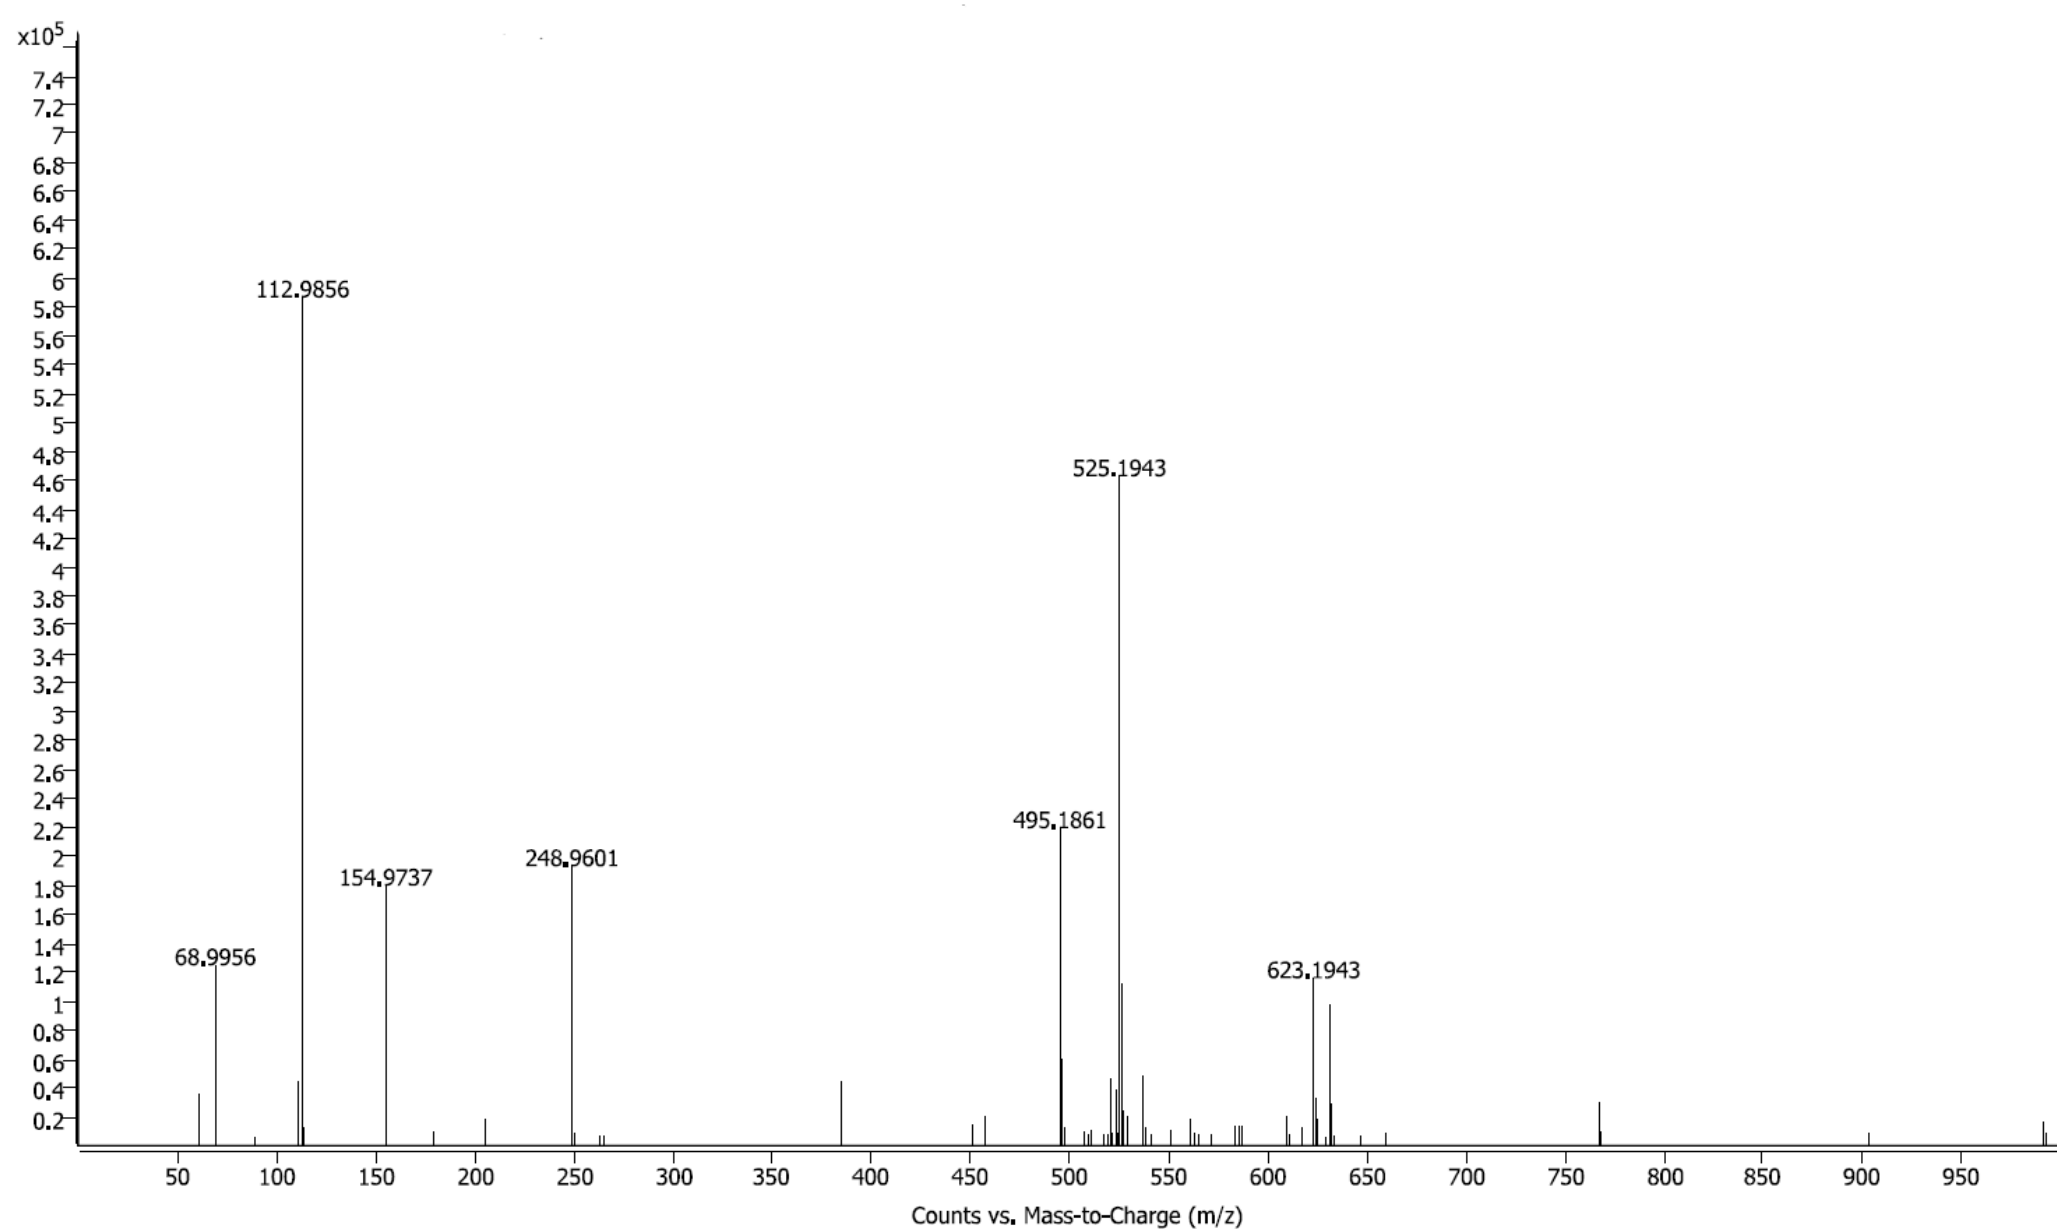

Figure S9. Circular Dichroism (CD) spectrum of 3-manolyl pteroside D.

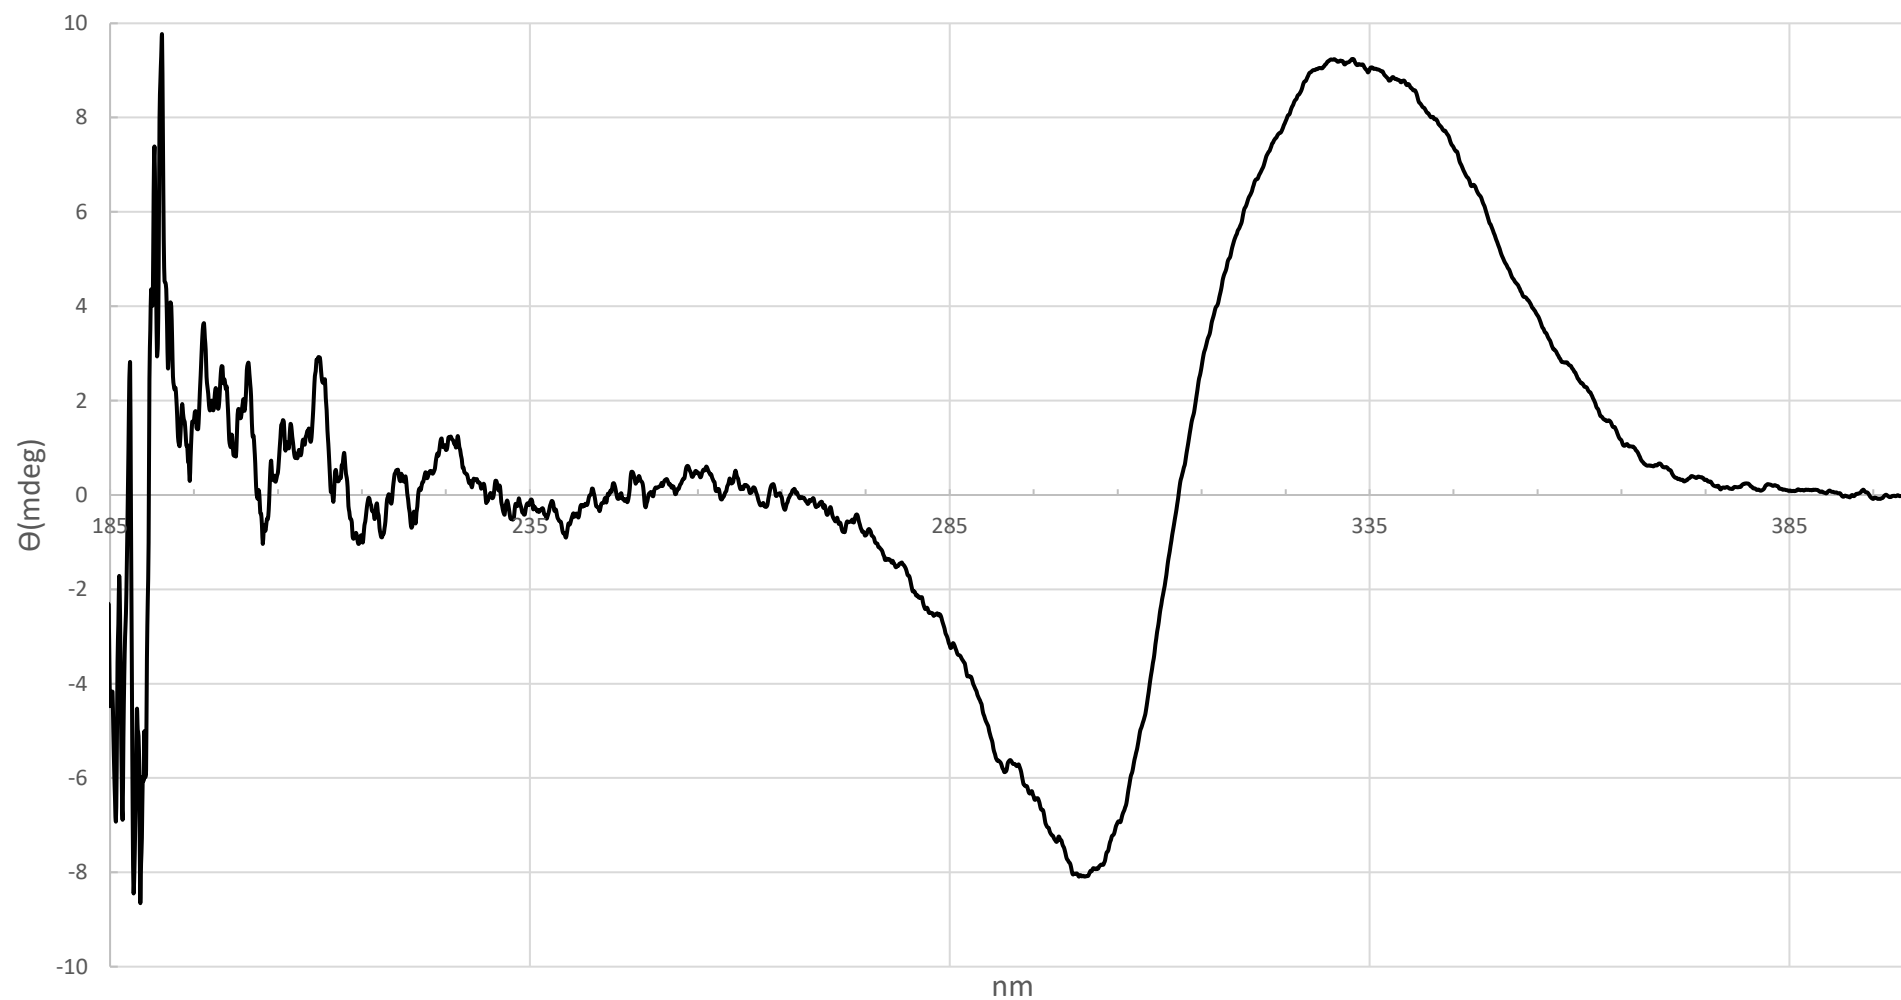

Figure S10. UV spectrum of 3-manolyl pteroside D.

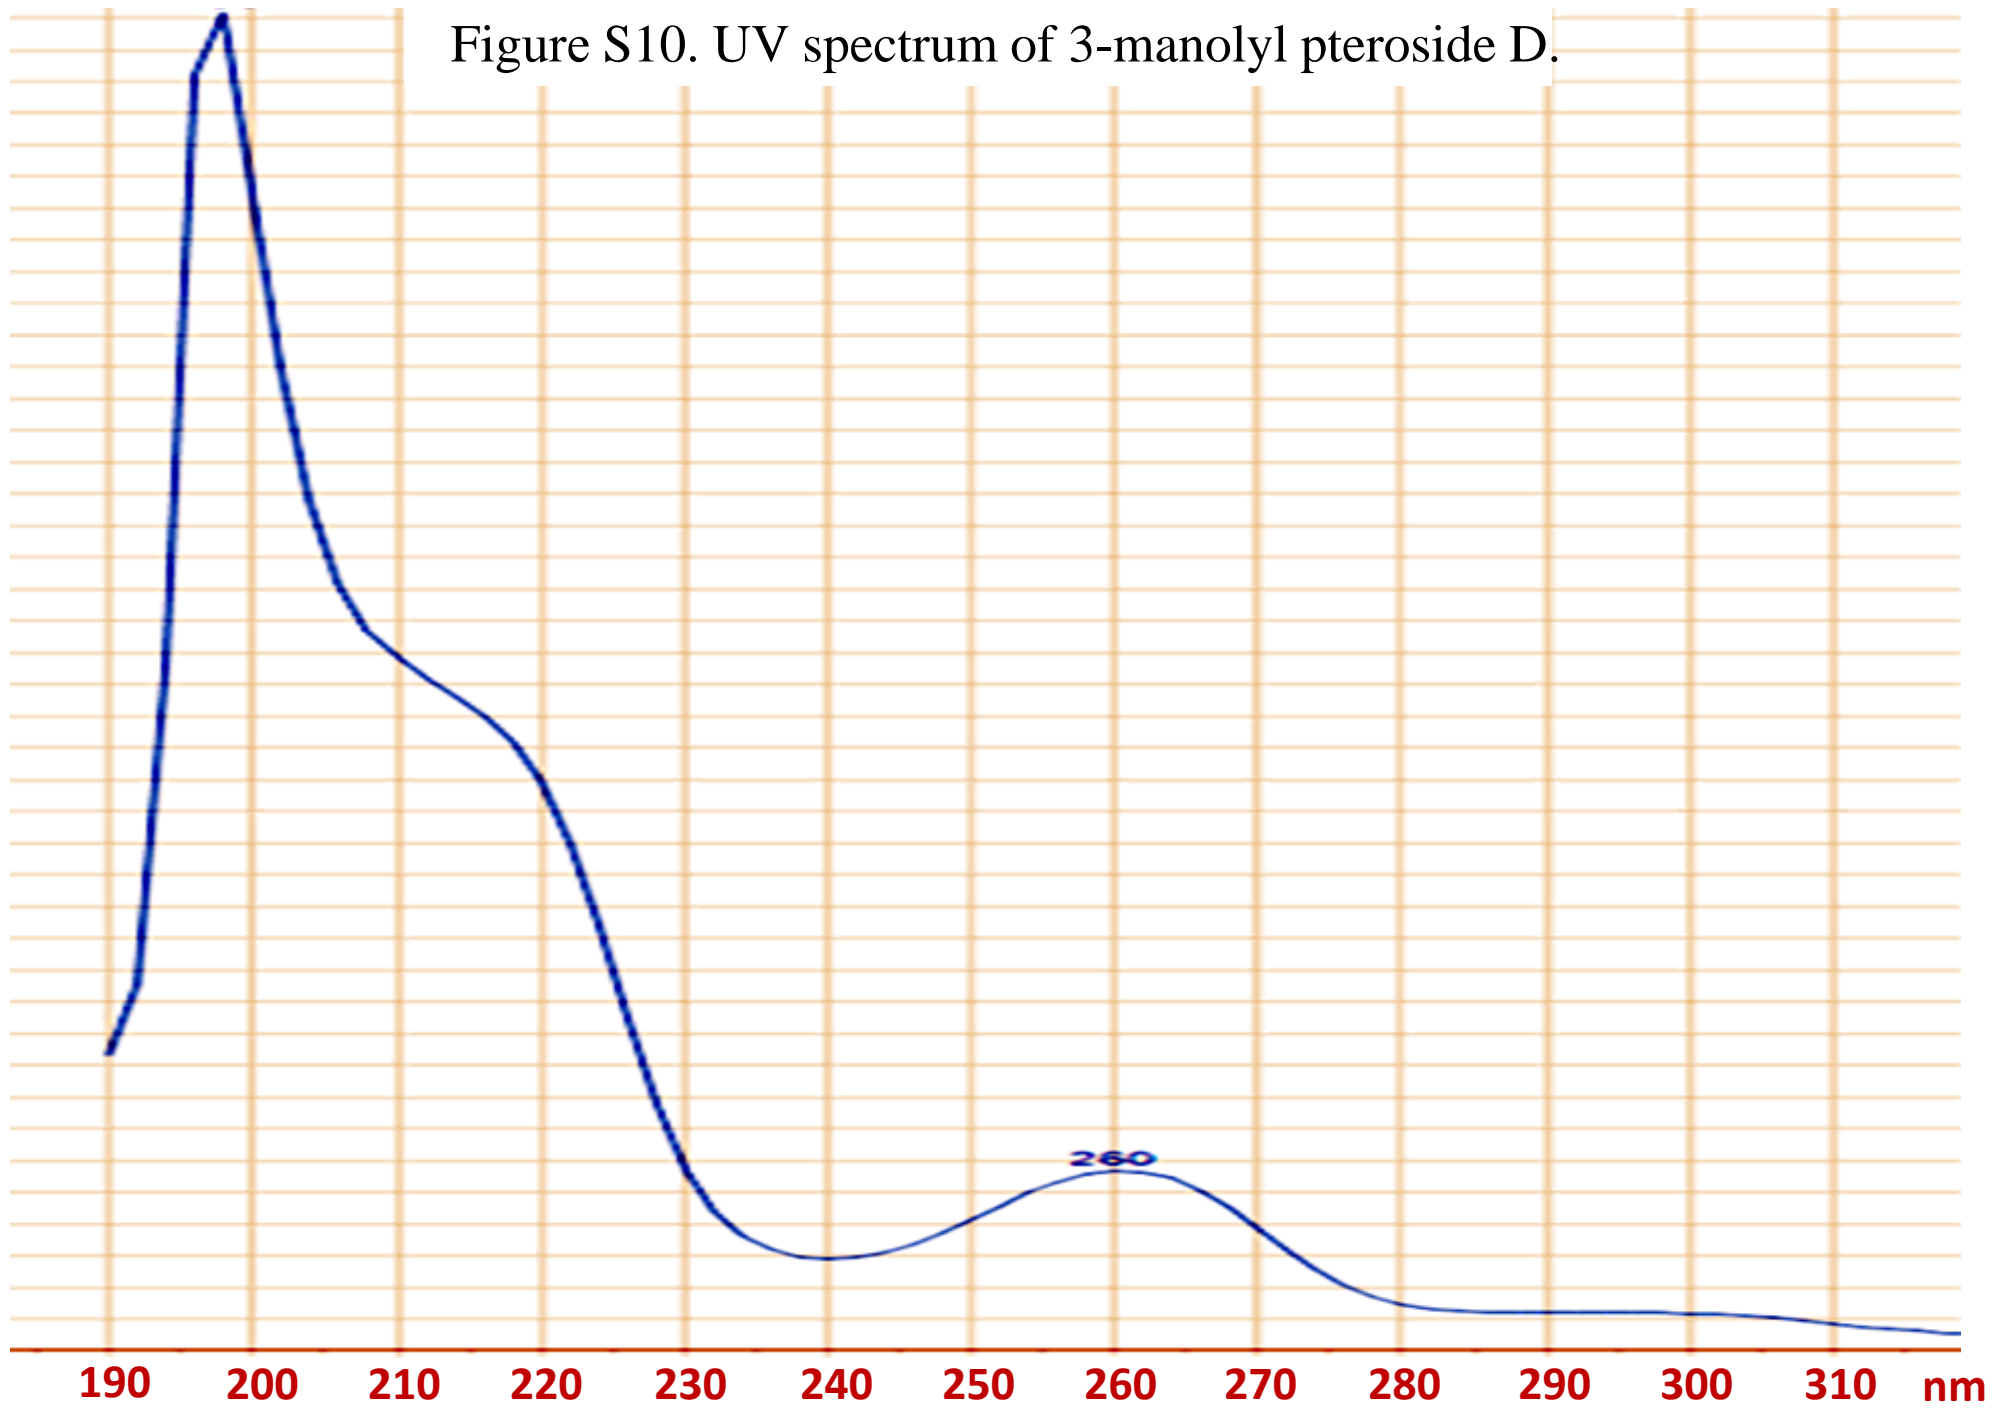

Supplement: s1 [file s1]
